# Supplementary material for: Hydrogen-bond assisted, aggregation-induced emission of digitonin
Source: Royal Society of Chemistry journal article supplement (doi:10.1039/c5ra16379j), 2015-01-01
Supplement: c5ra16379j1.pdf [file c5ra16379j1.pdf]

## Electronic Supplementary Information

### Hydrogen Bond Assisted Aggregation Induced Emission of Digitonin

Meegle S Mathew<sup>[a]</sup>, K. Sreenivasan<sup>[b]</sup> and Kuruvilla Joseph<sup>\*[a]</sup>

<sup>[a]</sup>Department of Chemistry, Indian Institute of Space Science and Technology, Valiamala, Thiruvananthapuram 695547, India Email: [kjoseph.iist@gmail.com](mailto:kjoseph.iist@gmail.com), [kuruvilla@iist.ac.in](mailto:kuruvilla@iist.ac.in), Ph No: 914712568633; fax: 914712568633

<sup>[b]</sup>Laboratory for Polymer Analysis, Biomedical Technology Wing, Sree Chitra Tirunal Institute for Medical Sciences and Technology, Poojapurra, Thiruvananthapuram 695012, India Email: [sreeni@sctimst.ac.in](mailto:sreeni@sctimst.ac.in).

#### Electronic Supplementary Information, S1:

(A) Calculation of quantum yield:

Quantum yield (QY) of digitonin and base treated digitonin ( $\Phi_s$ ) were calculated using quinine sulfate in 0.1M H<sub>2</sub>SO<sub>4</sub> as a standard ( $\Phi_0 = 0.54$ )<sup>1</sup>, according to previously reported procedure.<sup>2</sup>

$$\Phi_s = \Phi_0 \times \frac{I_s}{I_0} \times \frac{A_0}{A_s} \times \frac{n_s^2}{n_0^2}$$

| Sample             | Exc.<br>$\lambda$ (nm) | $\Phi_0$ | $A_0$   | $I_0$             | $n_0$ | $A_s$  | $I_s$             | $n_s$ | $\Phi_s$ |
|--------------------|------------------------|----------|---------|-------------------|-------|--------|-------------------|-------|----------|
| Digitonin          | 330                    | 0.54     | 0.06126 | $1.7 \times 10^8$ | 1.35  | 0.081  | $6.2 \times 10^5$ | 1.35  | 0.00145  |
| Digitonin-<br>NaOH | 380                    | 0.54     | 0.06126 | $1.7 \times 10^8$ | 1.35  | 0.0735 | $5.1 \times 10^7$ | 1.35  | 0.135    |

Where,  $\Phi_0$ : Reference QY,  $\Phi_s$ : Sample QY,  $I_0$  and  $A_0$  are the absorbance and intensity of reference respectively,  $I_s$  and  $A_s$  are intensity and absorbance of the sample respectively,  $n_0$  and  $n_s$  are the refractive index of the solvent used reference and sample respectively.

(B) Calculation of FRET efficiency

(i) Steady State FRET Efficiency ( $E_s$ )

$$E_s = 1 - \frac{\Phi_{DA}}{\Phi_D}$$

$\Phi_D$  donor alone quantum yield and  $\Phi_{DA}$  donor quantum yield in the presence of acceptor

$$E_s = 1 - \frac{0.085}{0.135}$$

$$E_s = 37\%$$

(ii) Time Resolved FRET Efficiency ( $E_T$ )

$$E_T = 1 - \frac{\tau_{DA}}{\tau_D}$$

$\tau_D$  donor alone lifetime and  $\tau_{DA}$  donor lifetime in the presence of acceptor

$$E_T = 1 - \frac{5.07}{8.1}$$

$$E_T = 37\%$$

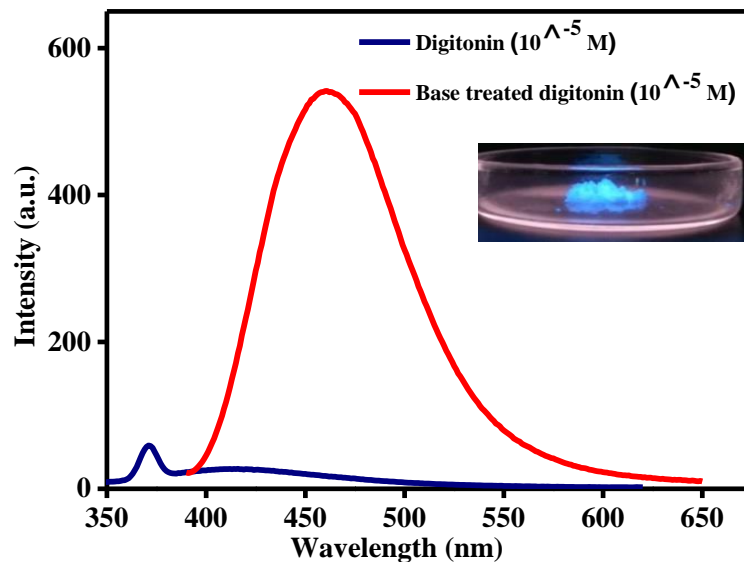

**Figure S2:** PL emission spectra of digitonin (a) and base treated digitonin (b) at a concentration of  $10^{-5}$  M. Inset: photographs of solid state emission of base treated digitonin under hand held UV light ( $\lambda_{ex}$ : 365 nm).

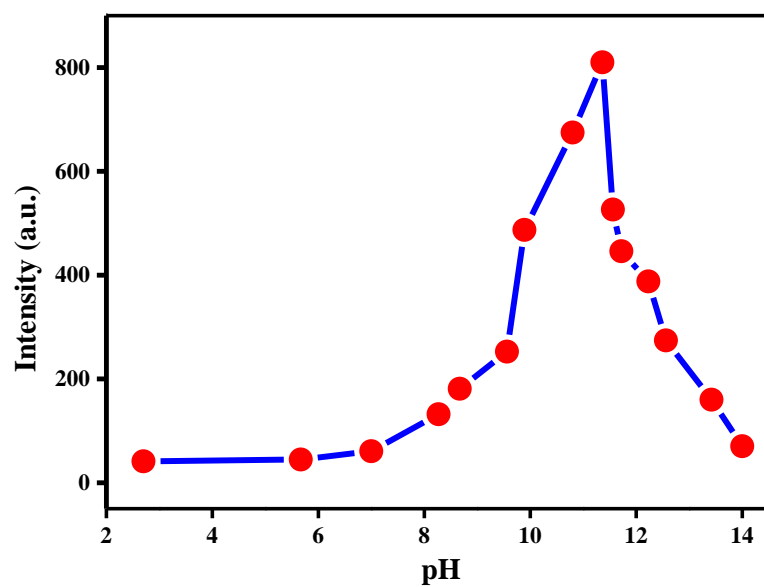

**Figure S3:** Plot of PL intensity verses pH of the solution (from pH 2.5 to 14)

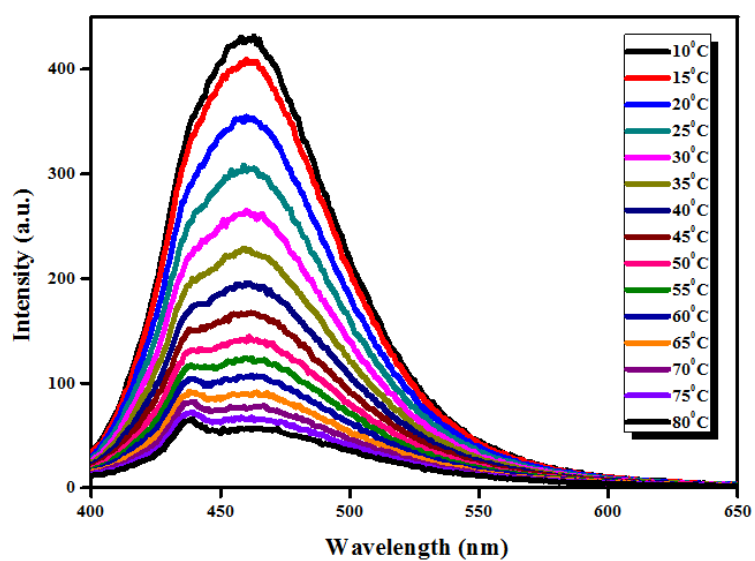

**Figure S4:** Temperature dependent PL emission spectra of aqueous solution of base treated digitonin.

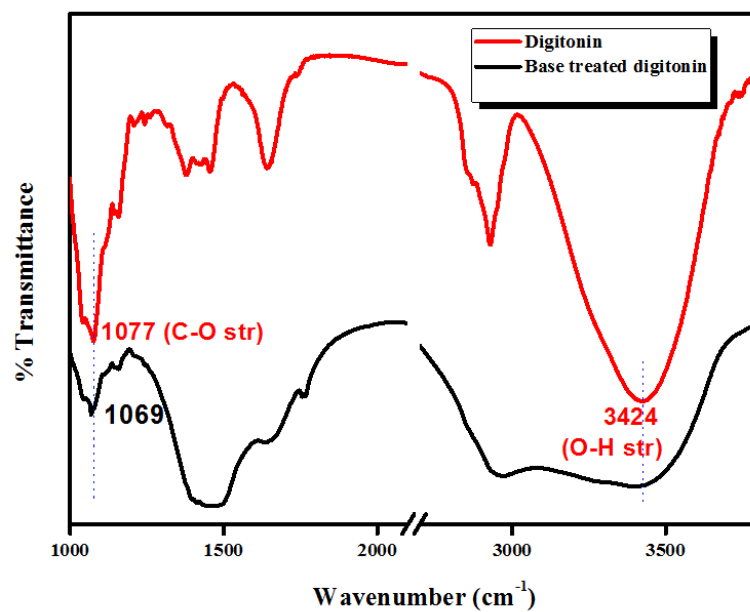

**Figure S5:** FTIR spectra of digitonin (red trace) and base treated digitonin (black trace).

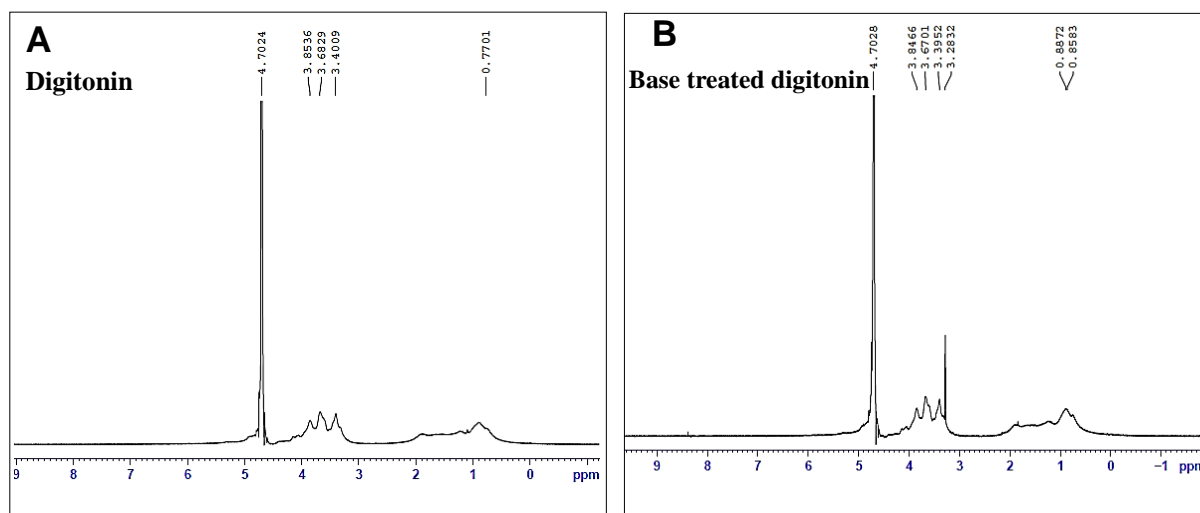

**Figure S6:** NMR spectra of digitonin (A) and base treated digitonin (B).

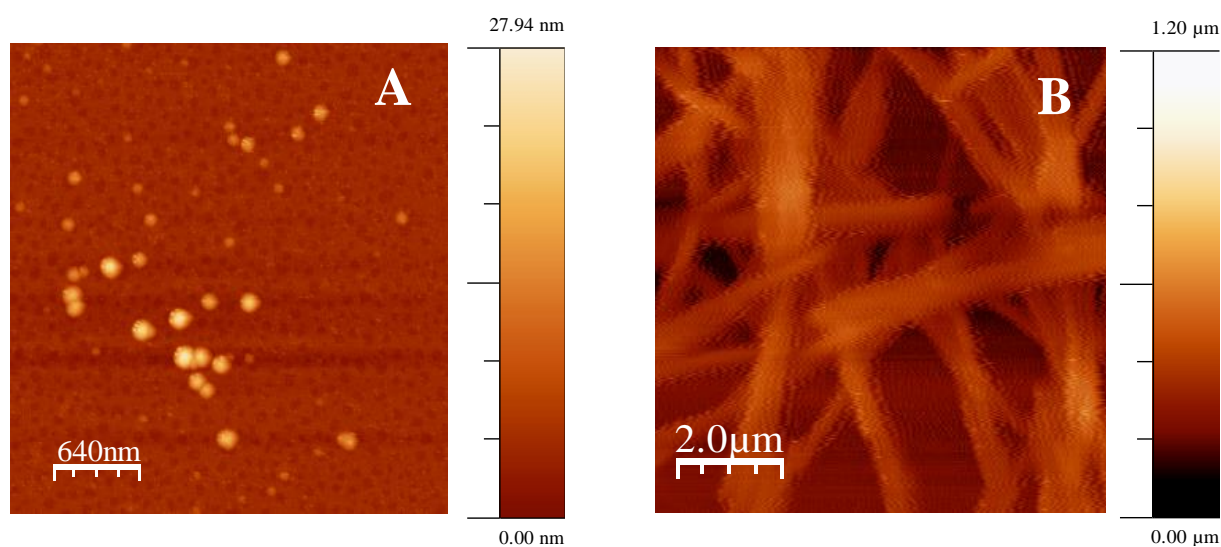

**Figure S7:** Atomic force microscopy (AFM) images of digitonin (A) and base treated digitonin (B).

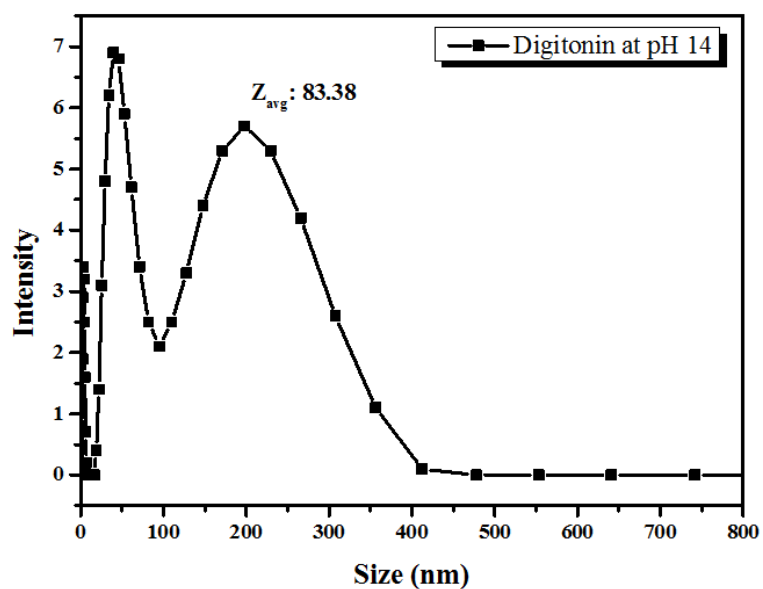

**Figure S8:** Dynamic light scattering measurements depicting average hydrodynamic diameter of digitonin at pH 14.

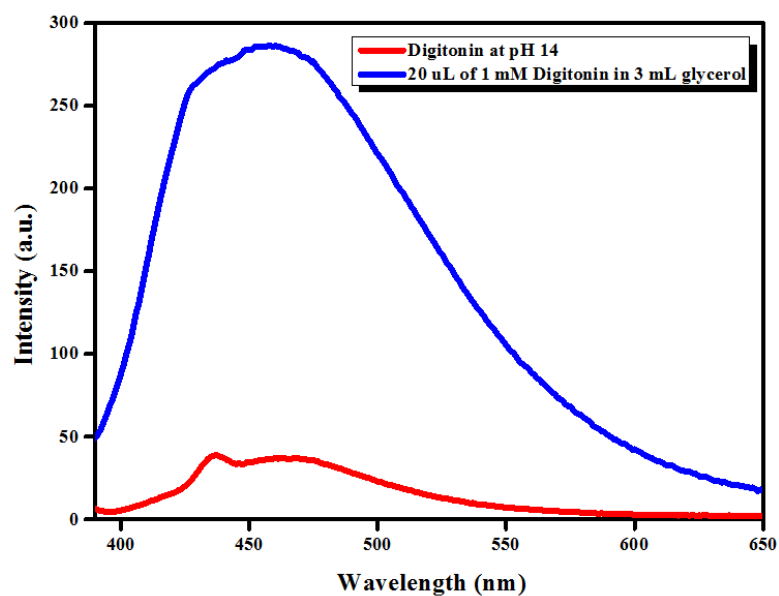

**Figure S9:** PL emission spectra of digitonin at pH 14 in the absence and presence of glycerol (viscosity dependent fluorescence study).

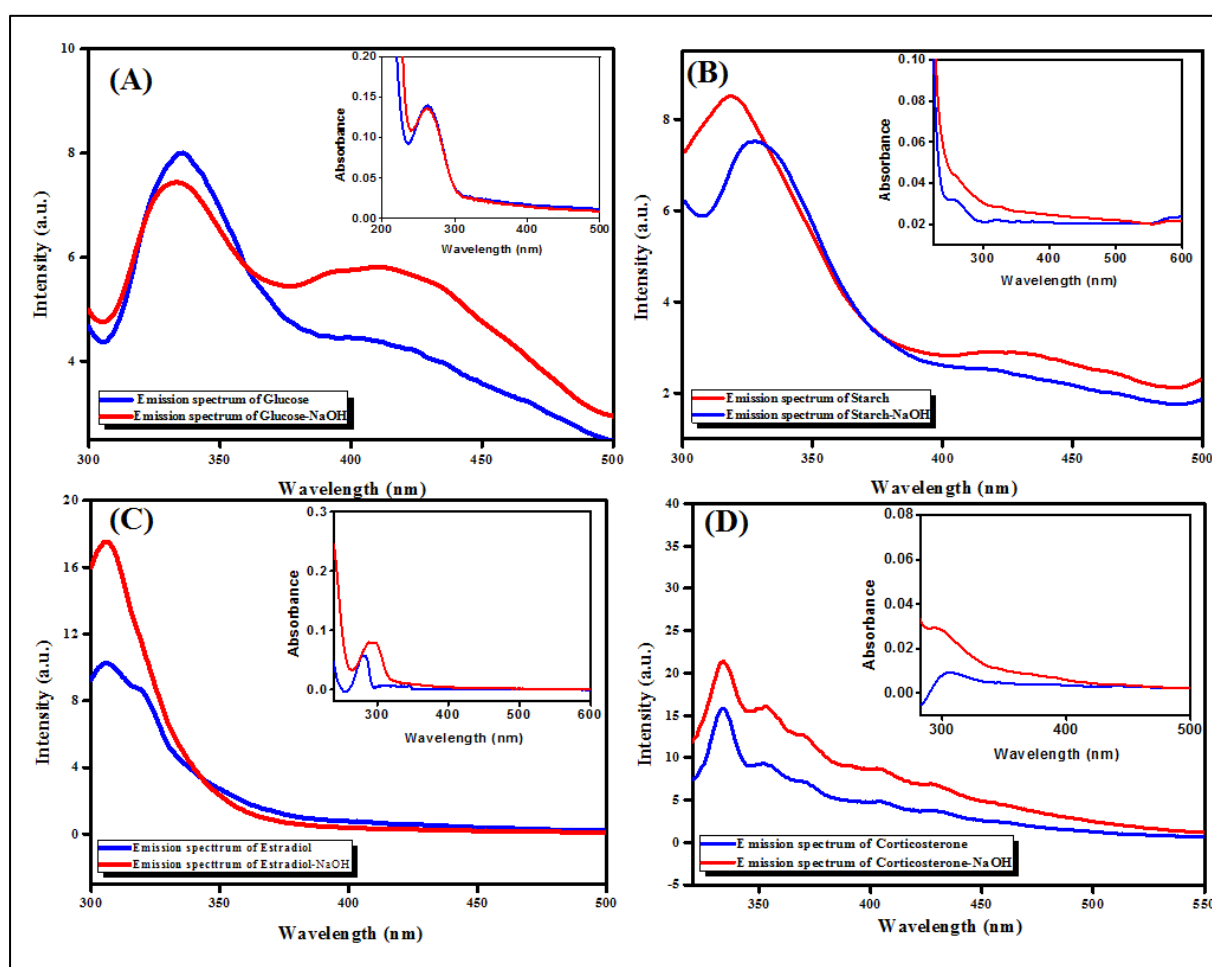

**Figure S10:** PL emission spectra carbohydrates and steroids in the absence (blue) and presence of base (red trace) (A) Glucose (B) Starch (C) Estradiol (D) Corticosterone. Corresponding absorption spectra is shown as inset.

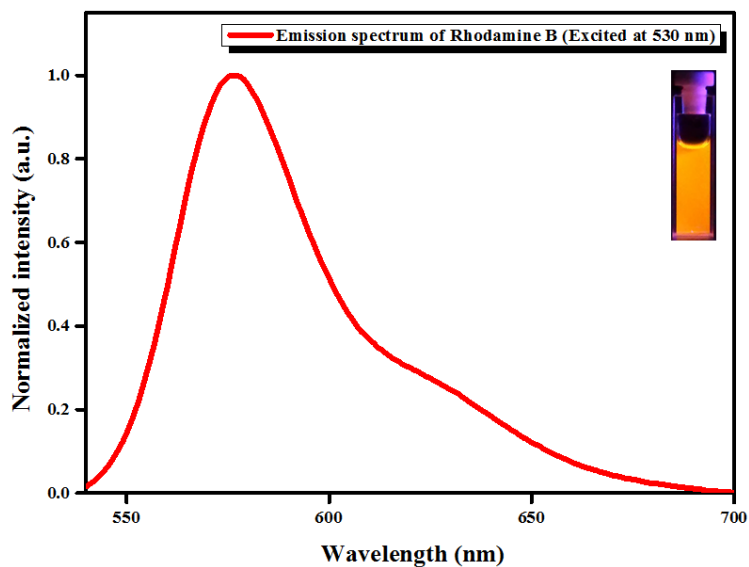

**Figure S11:** PL emission spectrum of Rhodamine B at 530 nm excitation, photograph under UV light is shown as inset.

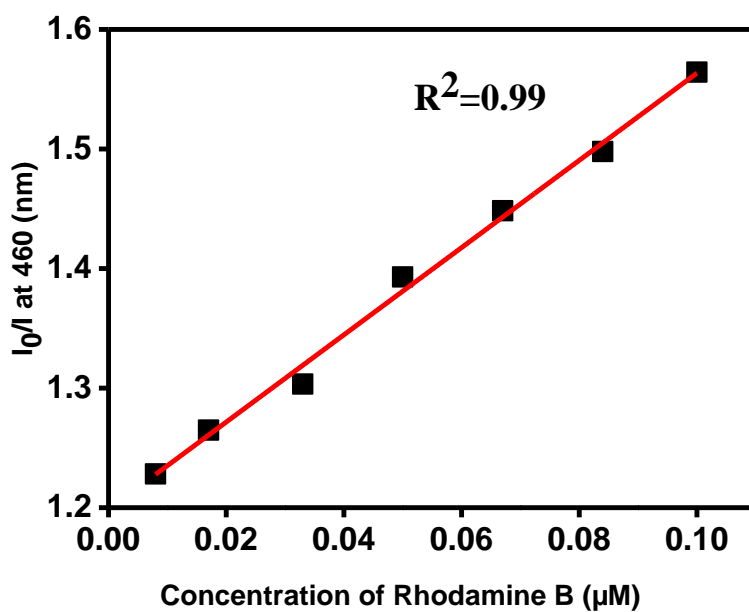

**Figure S12:** Stern-Volmer plot of  $I_0/I$  versus concentration of quencher for white light emitting base treated digitonin-Rhodamine mixture.

## Reference:

1. W. R. Dawson and M. W. Windsor, *J. Phys. Chem.*, 1968, **72**, 3251-3260.
2. Y. Fang, S. Guo, D. Li, C. Zhu, W. Ren, S. Dong and E. Wang, *ACS Nano*, 2012, **6**, 400-409.
